# Supplementary material for: Frequency of Parkinson’s Disease Genes and Role of PARK2 in Amyotrophic Lateral Sclerosis: An NGS Study
Source: MDPI journal article supplement (doi:10.3390/genes13081306), 2022-07-22
Supplement: s1 [file s1]

# Frequency of Parkinson's Disease genes and role of *PARK2* in Amyotrophic Lateral Sclerosis: a NGS study

Veria Vacchiano<sup>1,2</sup>, Anna Bartoletti-Stella<sup>3</sup>, Giovanni Rizzo<sup>1</sup>, Patrizia Avoni<sup>1,2</sup>, Piero Parchi<sup>1,2</sup>, Fabrizio Salvi<sup>1</sup>, Rocco Liguori<sup>1,2</sup>, Sabina Capellari<sup>1,2</sup>

<sup>1</sup>IRCCS Istituto delle Scienze Neurologiche di Bologna, Bellaria Hospital, 40139 Bologna, Italy.

<sup>2</sup>Dipartimento di Scienze Biomediche e Neuromotorie (DIBINEM), Università di Bologna, 40123 Bologna, Italy

<sup>3</sup>Department of Experimental Diagnostic and Specialty Medicine (DIMES), University of Bologna, 40138 Bologna, Italy\*

Correspondence: sabina.capellari@unibo.it

## Supplementary Materials

**Table S1:** Genes analyzed in this study

| Symbol         | Name                                      | PD Role [OMIM]                                                                          | Inheritance        |
|----------------|-------------------------------------------|-----------------------------------------------------------------------------------------|--------------------|
| <i>GBA</i>     | ACID BETA-GLUCOSIDASE                     | Lewy body dementia, susceptibility to; Parkinson disease, late-onset, susceptibility to | AD; multifactorial |
| <i>SNCA</i>    | SYNUCLEIN, ALPHA                          | Lewy body dementia; Parkinson disease 1; Parkinson disease 4                            | AD                 |
| <i>LRRK2</i>   | LEUCINE-RICH REPEAT KINASE 2              | Parkinson disease 8                                                                     | AD                 |
| <i>GCH1</i>    | GTP CYCLOHYDROLASE I                      | Dystonia, DOPA-responsive, with or without hyperphenylalaninemia                        | AD, AR             |
| <i>PINK1</i>   | PTEN-INDUCED PUTATIVE KINASE 1            | Parkinson disease 6, early onset                                                        | AR                 |
| <i>PARK2</i>   | PARKIN                                    | Parkinson disease, juvenile, type 2                                                     | AR                 |
| <i>PARK7</i>   | PARKINSON DISEASE 7                       | Parkinson disease 7, autosomal recessive early-onset                                    | AR                 |
| <i>SYNJ1</i>   | SYNAPTOJANIN 1                            | Parkinson disease 20, early-onset                                                       | AR                 |
| <i>PLA2G6</i>  | PHOSPHOLIPASE A2                          | Parkinson disease 14, autosomal recessive                                               | AR                 |
| <i>ATP13A2</i> | ATPase 13A2                               | Kufor-Rakeb syndrome                                                                    | AR                 |
| <i>DNAJC6</i>  | DNAJ/HSP40 HOMOLOG, SUBFAMILY C, MEMBER 6 | Parkinson disease 19a, juvenile-onset; Parkinson disease 19b, early-onset               | AR                 |
| <i>FXBO7</i>   | F-box only protein 7                      | Parkinson disease 25, early onset                                                       | AR                 |

Key: AD, autosomal dominant; AR, autosomal recessive.

**Table S2: Patients carrying at least one variant in the most frequent ALS-related genes**

| Gene           | ALS Patients<br>N (%) |
|----------------|-----------------------|
| <i>C9ORF72</i> | 8 (6.2)               |
| <i>SOD1</i>    | 5 (3.8)               |
| <i>FUS</i>     | 2 (1.5)               |
| <i>TARBP</i>   | 4 (3.1)               |
| Total          | 19 (14.6)             |

Key: ALS, amyotrophic lateral sclerosis

**Table S3: Classification of variant in autosomal dominant PD genes in ALS and AD patients**

| Patient | VARIANT                                           | GNOMAD EU  | Franklin ACMG Classification | Other mutated gene    |
|---------|---------------------------------------------------|------------|------------------------------|-----------------------|
| ALS-25  | <b><i>LRRK2</i><br/>c.7470A&gt;C p.Gln2490His</b> | NR         | VUS (PM2, BP4)               | <b><i>PARK2</i></b>   |
| ALS-29  | <i>LRRK2</i><br>c.7315C>A p.Leu2439Ile            | 0.00004408 | VUS (PM2, BP4)               |                       |
| AD-36   | <b><i>LRRK2</i><br/>c.6783T&gt;A p.Asn2261Lys</b> | NR         | VUS (PM2, BP4)               | <b><i>ATP13A2</i></b> |
| AD-47   | <i>LRRK2</i><br>c.683G>C p.Cys228Ser              | 0.0001632  | VUS (PM2, BP4)               |                       |

Key: ACMG, American College of Medical Genetics and Genomics guidelines for the interpretation of sequence variants provided by Franklin-Genoox (for details see Materials and Methods section); AD, Alzheimer's disease; ALS, amyotrophic lateral sclerosis; BP4, benign supporting; NR, not reported; VUS, variant of uncertain significance; PM2, pathogenic moderate. In bold patients carrying more than one variant. For reasons of simplification and data readability, we only report patients with at least one variant in Parkinson's Disease causative genes. Patients with no variants were not detailed in the Table.

**Table S4: Classification of variant in autosomal recessive genes in ALS patients**

| Patient | VARIANT                                             | GNOMAD EU         | Franklin ACMG Classification  | Other mutated gene  |
|---------|-----------------------------------------------------|-------------------|-------------------------------|---------------------|
| ALS-24  | <i>ATP13A2</i><br>c.2836A>T p.Ile946Phe             | 0.001549          | VUS (PM2)                     |                     |
| ALS-40  | <i>ATP13A2</i><br>c.1382delC p.Ala461ValfsTer5      | NR                | Likely pathogenic (PVS1, PM2) |                     |
| ALS-46  | <b><i>ATP13A2</i><br/>c.3059A&gt;G p.Tyr1020Cys</b> | <b>0.00004738</b> | <b>VUS (PM2)</b>              | <b><i>SOD1</i></b>  |
| ALS-91  | <i>ATP13A2</i><br>c.2947C>T p.Pro983Ser             | 0.00001787        | VUS (PM2, PP3)                |                     |
| ALS-2   | <i>CHCHD2</i><br>c.101C>T p.Pro34Leu                | 0.0002105         | VUS (PM2)                     |                     |
| ALS-2   | <i>DNAJC6</i><br>c.1112A>C p.Lys371Thr              | NR                | VUS (PP3, PM2)                |                     |
| ALS-27  | <i>DNAJC6</i><br>c.829G>A p.Ala277Thr               | 0.0008239         | VUS (BS1)                     |                     |
| ALS-81  | <i>DNAJC6</i><br>c.2048C>T p.Thr683Met              | 0.00003519        | VUS (PM2)                     |                     |
| ALS-60  | <i>FBXO7</i><br>c.301A>C p.Asn101His                | 0.000008794       | VUS (PM2, BP4)                |                     |
| ALS-98  | <b><i>FBXO7</i><br/>c.1538G&gt;A p.Arg513Gln</b>    | <b>NR</b>         | <b>VUS (PM2)</b>              | <b><i>PINK1</i></b> |
| ALS-15  | <i>PINK1</i><br>c.1342G>A p.Gly448Arg               | 0.00004403        | VUS (PM2, PP3)                |                     |
| ALS-18  | <i>PINK1</i><br>c.434C>T p.Thr145Met                | 0.00004396        | VUS (PM2, BP4)                |                     |
| ALS-53  | <i>PINK1</i><br>c.1609G>A p.Ala537Thr               | 0.00003097        | VUS (PM2)                     |                     |
| ALS-98  | <b><i>PINK1</i><br/>c.587C&gt;T p.Pro196Leu</b>     | 0.0003176         | VUS (PM2)                     | <b><i>FBXO7</i></b> |
| ALS-106 | <i>PINK1</i><br>c.587C>T p.Pro196Leu                | 0.0003176         | VUS (PM2)                     |                     |
| ALS-103 | <i>PARK7</i><br>c.535G>A p.Ala179Thr                | 0.0009910         | VUS (BP4)                     |                     |

|               |                                                           |                   |                                        |                       |
|---------------|-----------------------------------------------------------|-------------------|----------------------------------------|-----------------------|
| ALS-28        | <i>GCH1</i><br>c.671A>G p.Lys224Arg                       | 0.000513          | Likely pathogenic (PP5, PM2, PM1, PP2) |                       |
| ALS-12        | <i>PARK2</i><br>c.1204C>T p.Arg402Cys                     | 0.002245          | VUS (BS2)                              |                       |
| <b>ALS-25</b> | <b><i>PARK2</i></b><br><b>c.1204C&gt;T p.Arg402Cys</b>    | <b>0.002245</b>   | VUS (BS2)                              | <b><i>LRRK2</i></b>   |
| ALS-64        | <i>PARK2</i><br>c.1204C>T p.Arg402Cys                     | 0.002245          | VUS (BS2)                              |                       |
| ALS-80        | <i>PARK2</i><br>c.1204C>T p.Arg402Cys                     | 0.002245          | VUS (BS2)                              |                       |
| ALS-100       | <i>PARK2</i><br>c.701G>A p.Arg234Gln                      | 0.0002940         | VUS (PM2)                              |                       |
| ALS-113       | <i>PARK2</i><br>c.1204C>T p.Arg402Cys                     | 0.002245          | VUS (BS2)                              |                       |
| ALS-126       | <i>PARK2</i><br>c.1204C>T p.Arg402Cys                     | 0.002245          | VUS (BS2)                              |                       |
| ALS-129       | <i>PARK2</i><br>c.436T>C p.Phe146Leu                      | NR                | VUS (PP3, PM2)                         |                       |
| ALS-47        | <i>SYNJ1</i><br>c.2771T>G p.Val924Gly                     | NR                | Likely pathogenic (PP3, PM2)           |                       |
| ALS-73        | <i>SYNJ1</i><br>c.3881C>T p.Pro1294Leu                    | 0.0001497         | VUS (PM2)                              |                       |
| ALS-88        | <i>SYNJ1</i><br>c.3881C>T p.Pro1294Leu                    | 0.0001471         | VUS (PM2)                              |                       |
| ALS-95        | <i>SYNJ1</i><br>c.3863C>T p.Pro1288Leu                    | 0.0003329         | VUS (BS2)                              |                       |
| ALS-97        | <i>SYNJ1</i><br>c.1655C>T p.Ser552Phe                     | NR                | VUS (PM2, PP3)                         |                       |
| ALS-125       | <i>SYNJ1</i><br>c.4266T>A p.Ser1422Arg                    | NR                | VUS (PM2)                              |                       |
| ALS-128       | <i>PLA2G6</i><br>c.977T>C p.Met326Thr                     | 0.00002895        | VUS (PM2, PM1, PP2)                    |                       |
| AD-19         | <i>ATP13A2</i><br>c.1537G>A p.Asp513Asn                   | NR                | Likely pathogenic (PP3, PM2)           |                       |
| <b>AD-36</b>  | <b><i>ATP13A2</i></b><br><b>c.3320C&gt;T p.Ala1107Val</b> | <b>0.00002398</b> | <b>VUS (PM2, BP4)</b>                  | <b><i>LRRK2</i></b>   |
| <b>AD-38</b>  | <b><i>ATP13A2</i></b><br><b>c.2062G&gt;A p.Val688Met</b>  | <b>NR</b>         | <b>VUS (PM2)</b>                       | <b><i>PLA2G6</i></b>  |
| AD-55         | <i>ATP13A2</i><br>c.1630C>T p.Arg544Cys                   | 0.00007721        | VUS (PM2, BP4)                         |                       |
| AD-57         | <i>CHCHD2</i><br>c.134C>G p.Ser45Cys                      | NR                | VUS (PM2, BP4)                         |                       |
| AD-71         | <i>DNAJC6</i><br>c.397A>T p.Met133Leu                     | 0.0006365         | VUS (PP3, BS1)                         |                       |
| <b>AD-20</b>  | <b><i>FBXO7</i></b><br><b>c.277T&gt;A p.Ser93Thr</b>      | <b>NR</b>         | <b>VUS (PM2, BP4)</b>                  | <b><i>PARK2</i></b>   |
| AD-74         | <i>PARK2</i><br>c.1028C>T p.Pro343Leu                     | 0.0001087         | VUS (PM2, PP3)                         |                       |
| <b>AD-20</b>  | <b><i>PARK2</i></b><br><b>c.719C&gt;T p.Thr240Met</b>     | <b>NR</b>         | <b>Pathogenic (PP5, PM2, PP3, PM5)</b> | <b><i>FBXO7</i></b>   |
| AD-52         | <i>PARK2</i><br>c.719C>T p.Thr240Met                      | 0.0002323         | Pathogenic (PP5, PM2, PP3, PM5)        |                       |
| AD-56         | <i>PARK2</i><br>c.455G>T p.Gly152Val                      | NR                | VUS (PM2)                              |                       |
| AD-15         | <i>PINK1</i><br>c.1600_1602dupCAA<br>p.Gln534dup          | 0.000008790       | VUS (PM2, PM4, PP5)                    |                       |
| <b>AD-38</b>  | <b><i>PLA2G6</i></b><br><b>c.1426A&gt;G p.Thr476Ala</b>   | <b>0.00003878</b> | <b>VUS (PM2, PP2)</b>                  | <b><i>ATP13A2</i></b> |
| AD-61         | <i>PLA2G6</i><br>c.284A>G p.Tyr95Cys                      | NR                | VUS (PM2, PP2)                         |                       |
| <b>AD-14</b>  | <b><i>SYNJ1</i></b><br><b>c.3533G&gt;A p.Arg1178Lys</b>   | <b>NR</b>         | <b>VUS (PM2)</b>                       | <b><i>GBA</i></b>     |
| AD-45         | <i>SYNJ1</i><br>c.4266T>A p.Ser1422Arg                    | <b>0.00001551</b> | VUS (PM2)                              |                       |
| AD-50         | <i>SYNJ1</i><br>c.1720G>A p.Val574Ile                     | 0.0001785         | VUS (PM2)                              |                       |
| AD-87         | <i>SYNJ1</i><br>c.3863C>T p.Pro1288Leu                    | 0.0003329         | VUS (PM2)                              |                       |

Key: ACMG, American College of Medical Genetics and Genomics guidelines for the interpretation of sequence variants provided by Franklin-Genoox (for details see Materials and Methods section); AD, Alzheimer's disease; ALS, amyotrophic lateral sclerosis; BS1 and BS2, benign strong; BP4, benign supporting; NR, not reported; PM1, PM2, PM4 and PM5, pathogenic moderate; PP2, PP3 and PP5, pathogenic supporting; PVS1, pathogenic very strong; VUS, variant

of uncertain significance. In bold patients carrying more than one variant. For reasons of simplification and data readability, we only report patients with at least one variant in Parkinson's Disease causative genes. Patients with no variants were not detailed in the Table.

**Table S5: Classification of *GBA* variants in ALS and AD patients**

| Patient      | VARIANT                                                                       | GNOMAD EU        | Franklin ACMG Classification                  | Other mutated gene |
|--------------|-------------------------------------------------------------------------------|------------------|-----------------------------------------------|--------------------|
| ALS-57       | <i>GBA</i><br>c.27+5G>C                                                       | NR               | VUS (PM2)                                     |                    |
| ALS-102      | <i>GBA</i><br>c.1093G>A p.Glu365Lys<br><br><i>GBA</i><br>c.882T>G p.His294Gln | NR               | NA, Likely complex allele                     |                    |
| AD-1         | <i>GBA</i><br>c.882T>G p.His294Gln                                            | 0.0003025        | Likely pathogenic (PM2, PM1, PP2, PP5)        |                    |
| <b>AD-14</b> | <b><i>GBA</i><br/>c.882T&gt;G p.His294Gln</b>                                 | <b>0.0003025</b> | <b>Likely pathogenic (PM2, PM1, PP2, PP5)</b> | <i>SYNJ1</i>       |
| AD-59        | <i>GBA</i><br>c.1224G>A p.Thr408=                                             | 0.0003103        | VUS (PM2, PP3)                                |                    |

Key: ACMG, American College of Medical Genetics and Genomics guidelines for the interpretation of sequence variants provided by Franklin-Genoox (for details see Materials and Methods section); AD, Alzheimer's disease; ALS, amyotrophic lateral sclerosis; NR, not reported; PM1 and PM2, pathogenic moderate; PP2, PP3 and PP5, pathogenic supporting; VUS, variant of uncertain significance. In bold patients carrying more than one variant. For reasons of simplification and data readability, we only report patients with at least one variant in Parkinson's Disease causative genes. Patients with no variants were not detailed in the Table.
